# Supplementary material
Source: publisher figshare collection journal article supplement (https://acs.figshare.com/ndownloader/files/4212523)
Supplement: Supplementary file 1 [file 4212523]

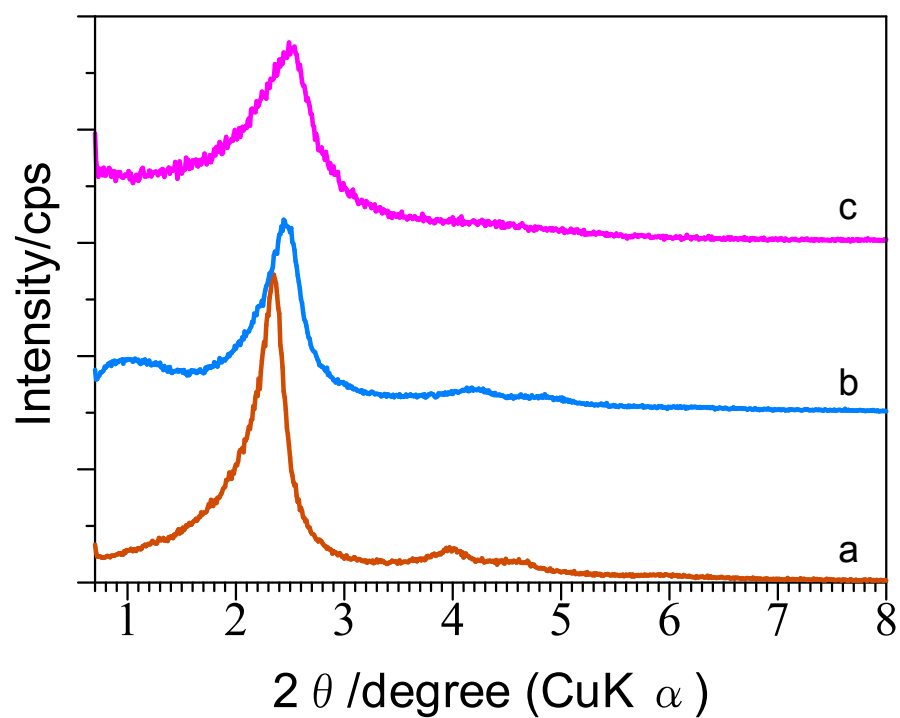

Fig. S1 XRD patterns of MCM-41 (MCM, a), nitrated MCM-41 (NMCM, b), and methylated NMCM-41 (Me-NMCM, c).

Table S1 Nitrogen and carbon contents in MCM, NMCM, and Me-NMCM.

| Name    | N / wt% | N / mmol/g | C / wt% | C / mmol/g | C/N<br>(-) |
|---------|---------|------------|---------|------------|------------|
| MCM     | 0       | 0          | 0       | 0          | 0          |
| NMCM    | 4.4     | 3.2        | 0       | 0          | 0          |
| Me-NMCM | 1.1     | 0.76       | 0.94    | 0.78       | 1.0        |

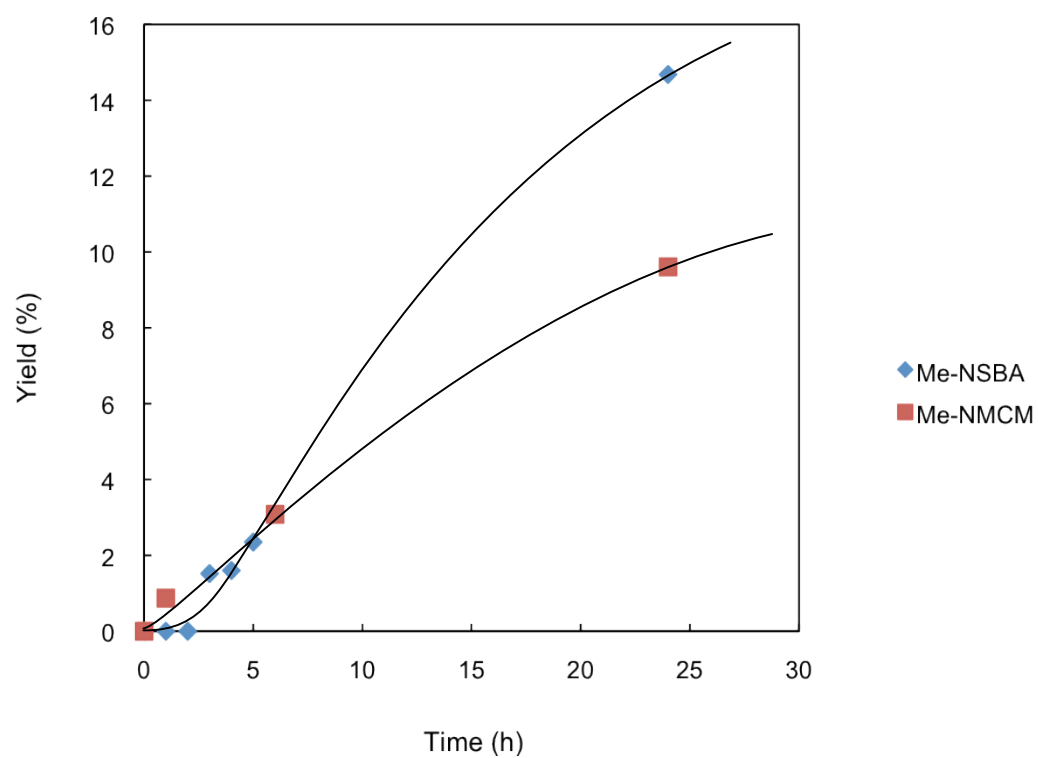

Fig. S2 The catalytic performance of Me-NMCM for Knoevenagel condensation using benzaldehyde and diethyl malonate, as compared with Me-NSBA.
